# Supplementary material
Source: PubMed Central journal article supplement (PMC2737816)

Suppl. Figure 1a

COL1A1

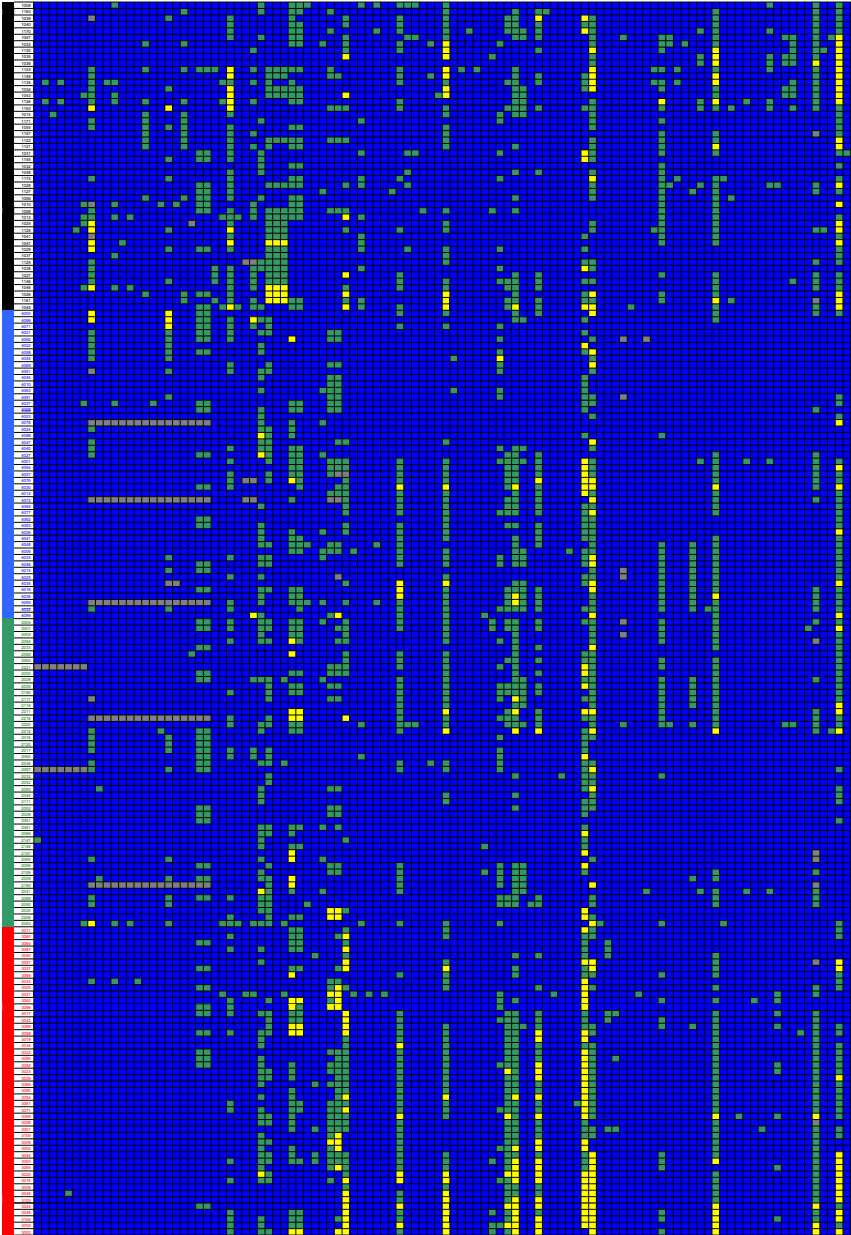

Suppl. Figure 1b

COL1A2

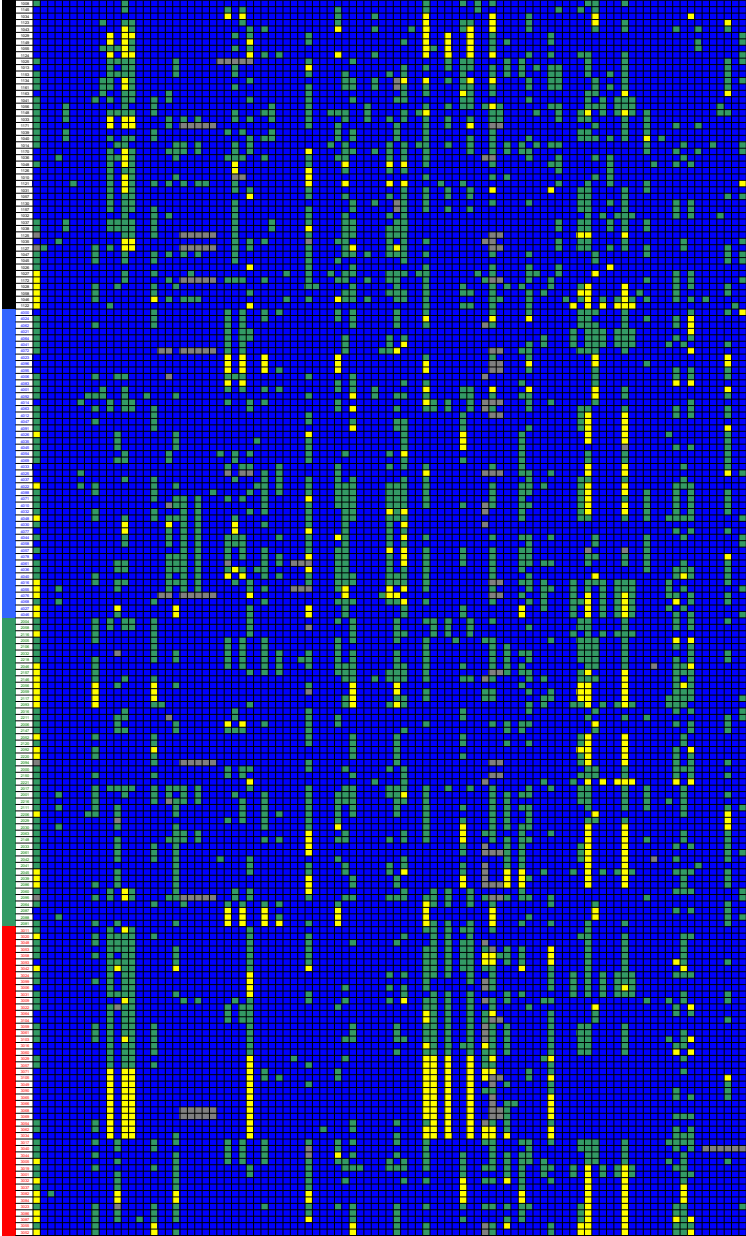

Suppl. Figure 1c

COL2A1

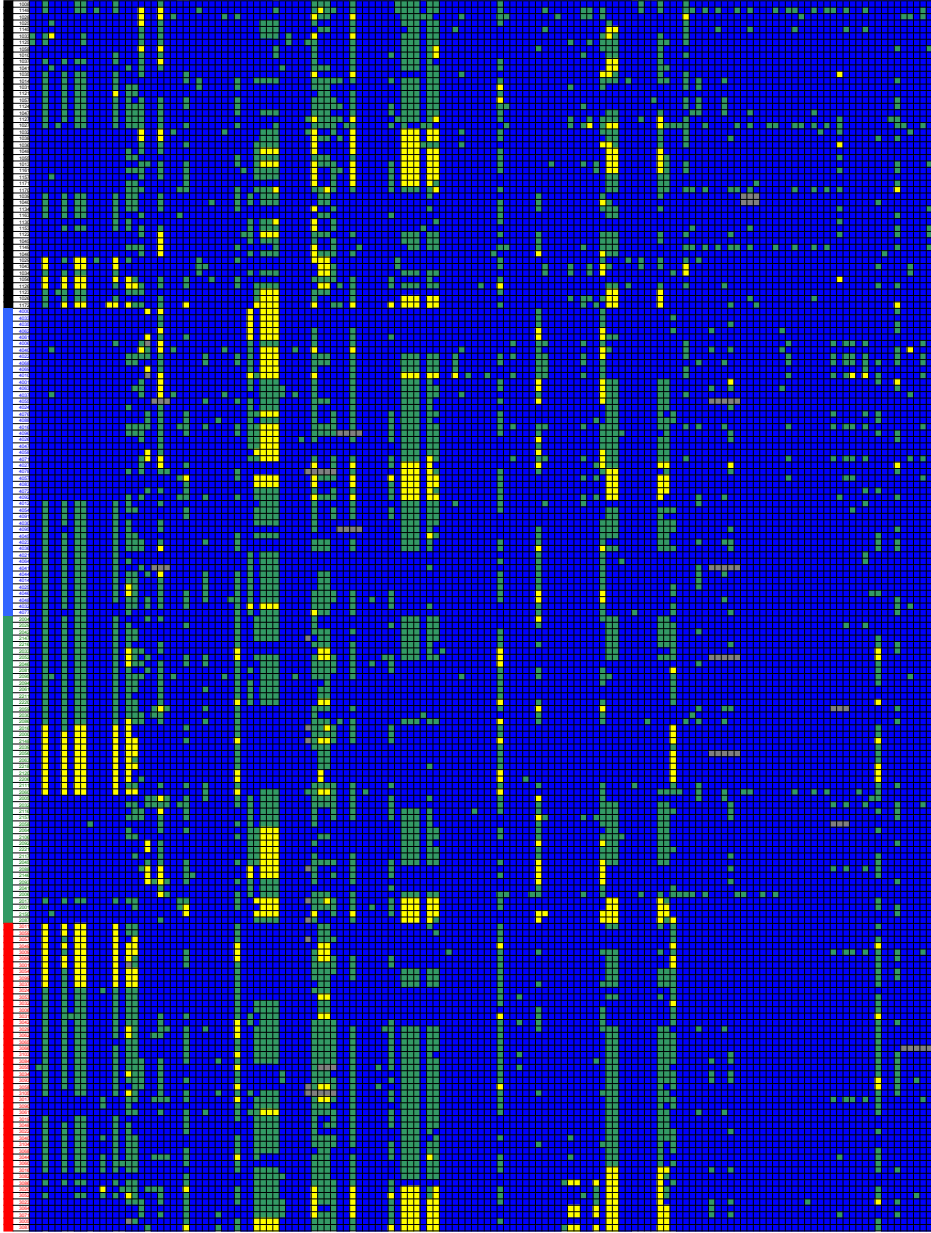

Suppl. Figure 1d

COL3A1

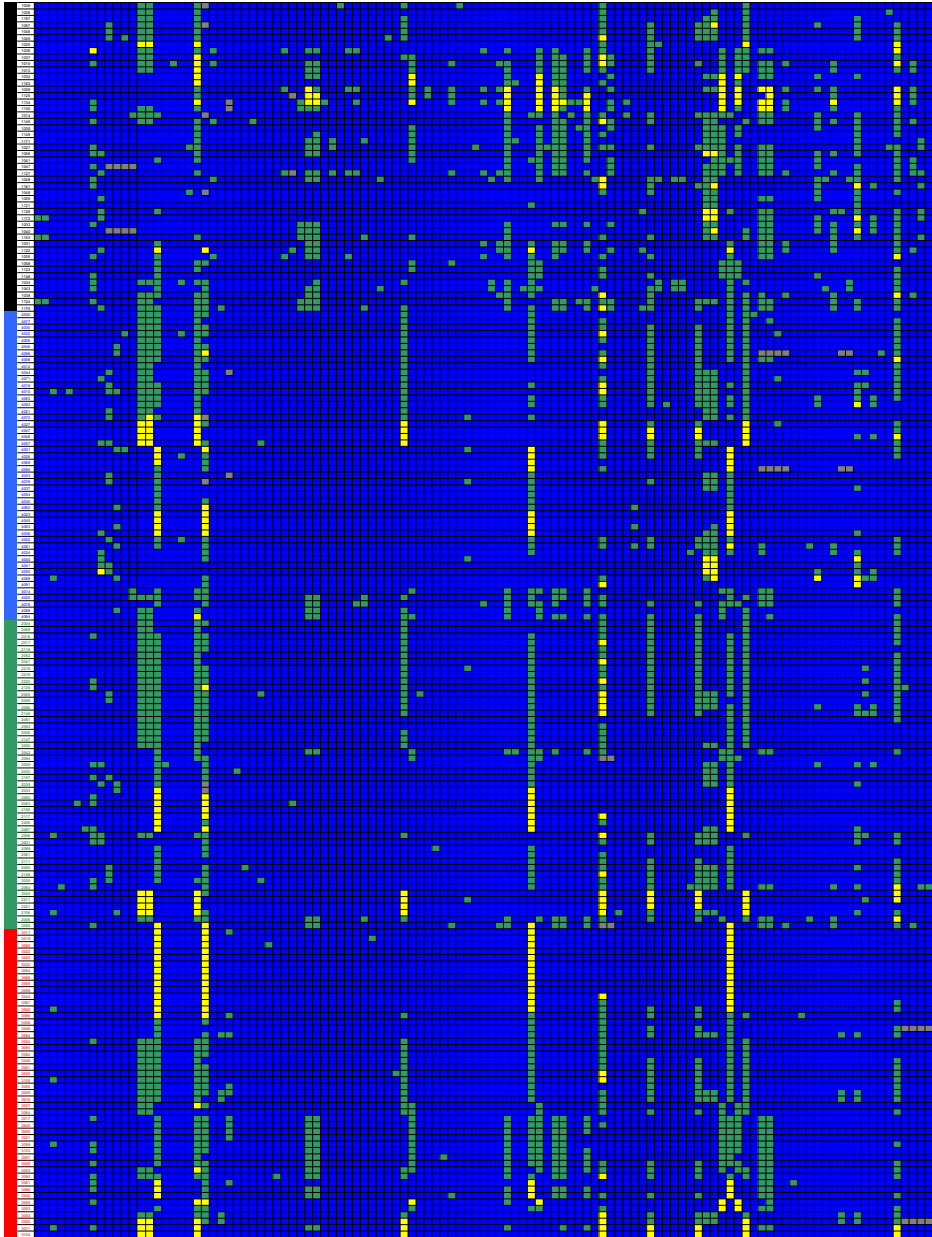

Supplement: NIHMS46284-supplement-02.pdf [file NIHMS46284-supplement-02.pdf]
